# Supplementary material for: Thermoelectric properties of a Mn substituted synthetic tetrahedrite
Source: Royal Society of Chemistry journal article supplement (doi:10.1039/c4cp04039b), 2014-12-02
Supplement: c4cp04039b1.pdf [file c4cp04039b1.pdf]

Supporting information

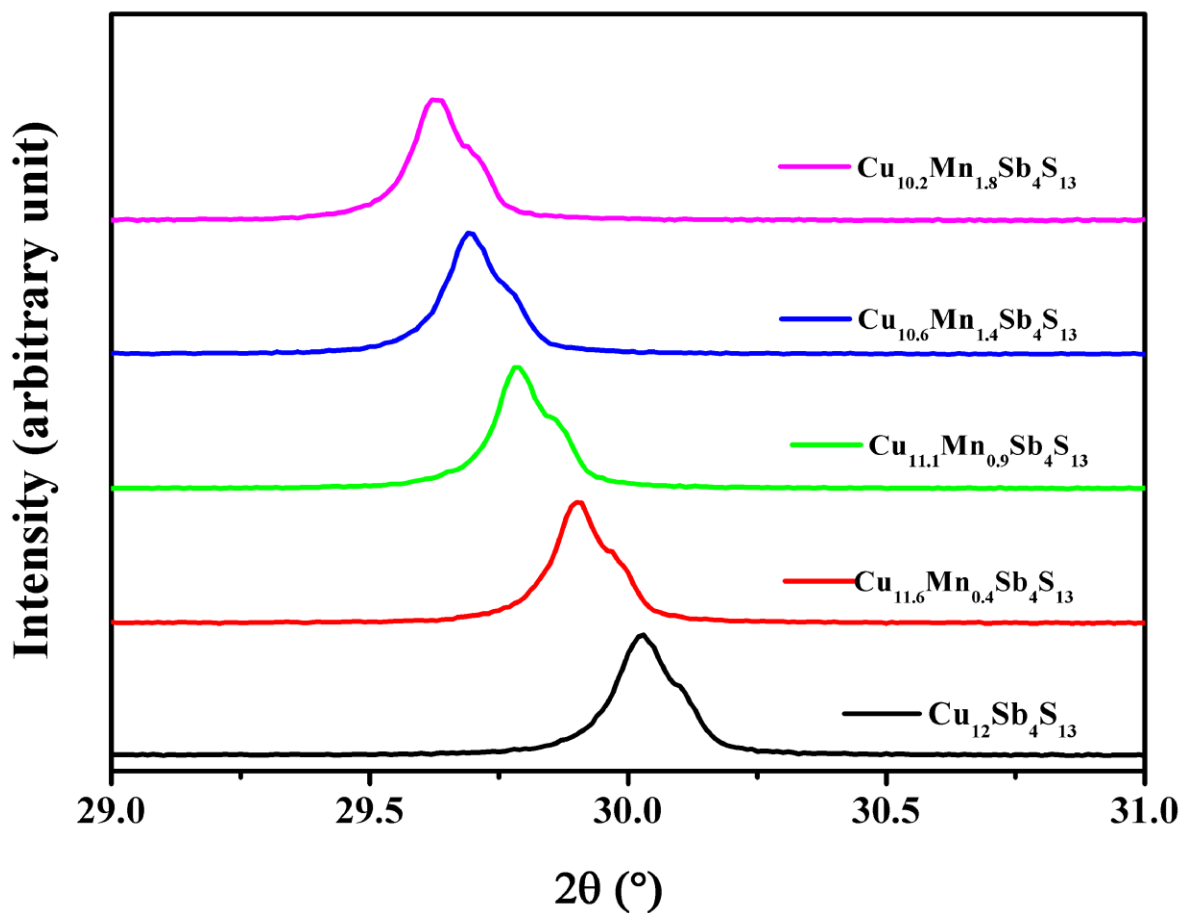

Figure S1. Maximum intensity peak of all the samples related to the (222) plane.

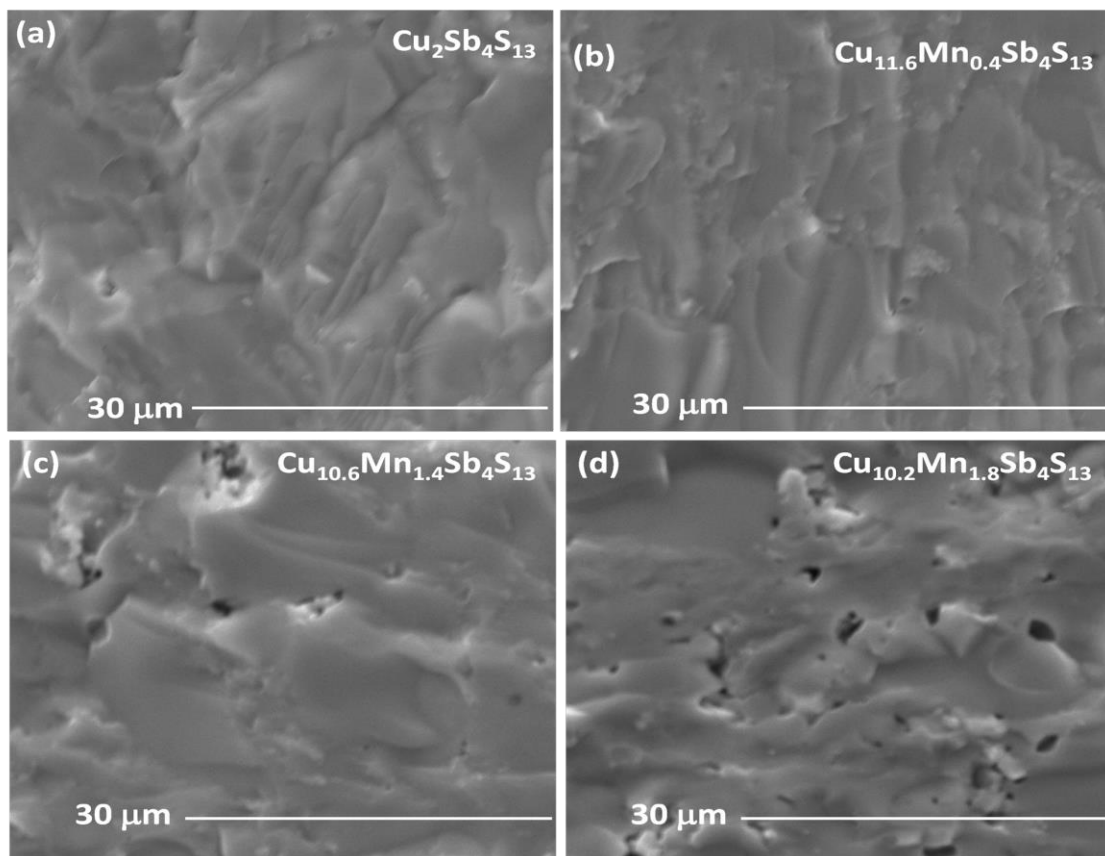

Figure S2. (a-d) secondary electron SEM images for  $\text{Cu}_{12-x}\text{Mn}_{1-x}\text{Sb}_4\text{S}_{13}$  ( $x = 0, 0.4, 1.4, 1.8$ ).

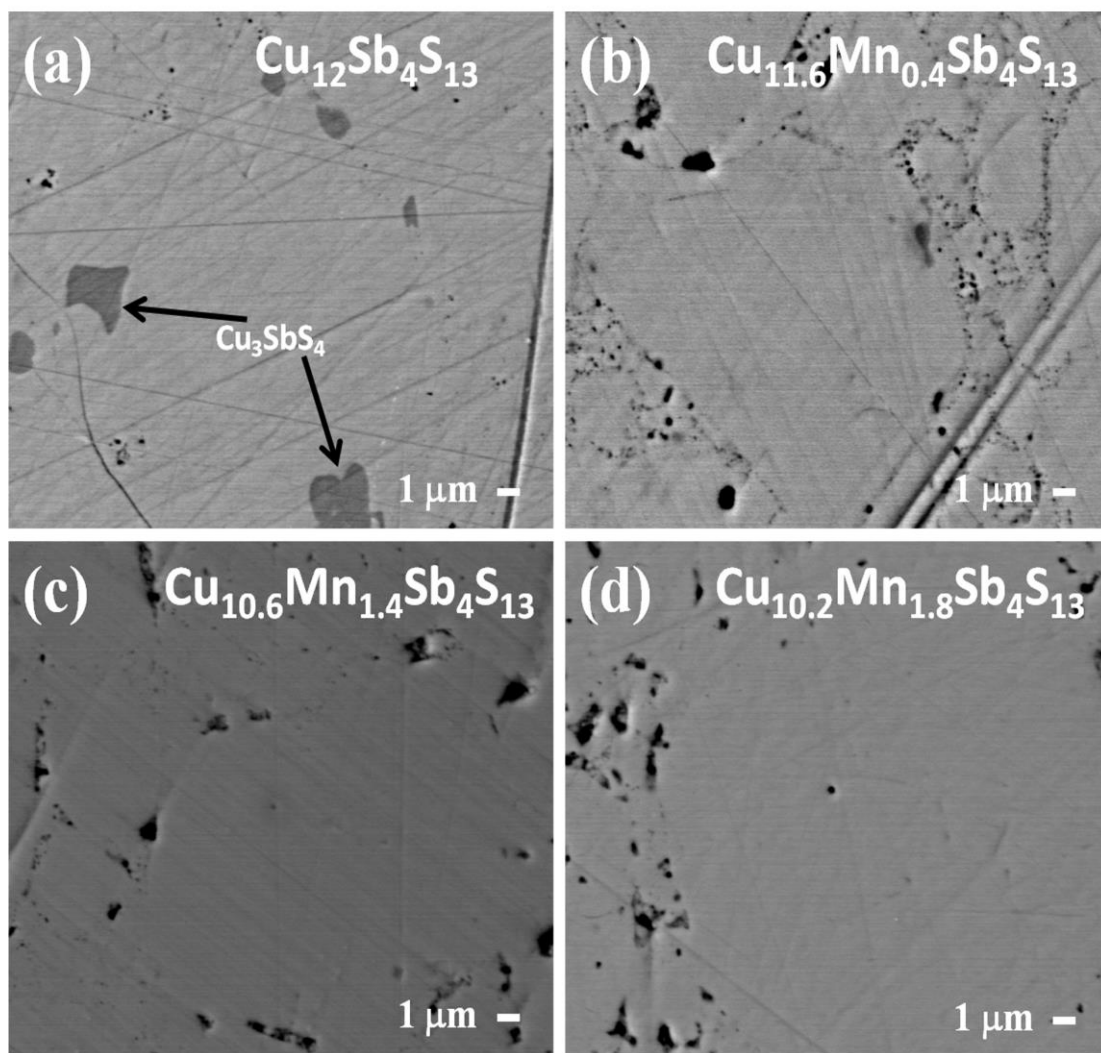

Figure S3. (a-d) Back scatter electron micrographs for  $\text{Cu}_{12-x}\text{Mn}_{1-x}\text{Sb}_4\text{S}_{13}$  ( $x = 0, 0.4, 1.4, 1.8$ ).
